# Supplementary material for: Chirality enhancement through addition of achiral molecules
Source: Royal Society of Chemistry journal article supplement (doi:10.1039/b915567h), 2010-01-01
Supplement: b915567h.pdf [file b915567h.pdf]

Supporting Information for

## **Chirality enhancement through addition of achiral molecules**

**Paul Archer and Ingo Dierking\***

*\* School of Physics and Astronomy, University of Manchester, Schuster Laboratory, Oxford Road, Manchester, UK. Fax: +44 161 278 4056; Tel: +44 161 275 4067; E-mail:ingo.dierking@manchester.ac.uk*

### Experimental equipment

The electro-optic setup consisted of a Leica DMLP polarising microscope with a Mettler Toledo hotstage (FP82HT) and controller (FP90) for relative temperature accuracy of 0.1 K. Electric fields were applied using a function generator (TGA12101, Thurlby Thandar) in conjunction with an in-house built high voltage amplifier. A digital storage oscilloscope (Tektronix TDS3024B) was used to record the electro-optic response and current reversal curves after averaging to reduce statistical noise. An electric field frequency of 57 Hz was used throughout with amplitudes up to  $4 \text{ V}\mu\text{m}^{-1}$ . A digital storage oscilloscope (Tektronix TDS3024B) was used to record the electro-optic response and current reversal curves after averaging to reduce statistical noise.
